# Supplementary material for: Little Cigars, Filtered Cigars, and their Carbonyl Delivery Relative to Cigarettes
Source: PubMed Central journal article supplement — Nicotine Tob Res. 2018 Aug 14;20(Suppl 1):S99–S106. doi: 10.1093/ntr/ntx274 (PMC6093475; doi:10.1093/ntr/ntx274), 2018-08-14
Supplement: ntx274_suppl_supplementary_materials.pdf [file ntx274_suppl_supplementary_materials.pdf]

## Supplementary Materials for:

*Little Cigars, Filtered Cigars, and Their Carbonyl Delivery Relative to Cigarettes*

Samantha M. Reilly, Ph.D.<sup>†</sup>; Reema Goel, Ph.D.<sup>†</sup>; Zachary Bitzer, Ph.D.<sup>‡</sup>; Ryan J. Elias, Ph.D.<sup>‡</sup>; Jonathan Foulds, Ph.D.<sup>†</sup>; Joshua Muscat, Ph.D.<sup>†</sup>; John P. Richie, Jr., Ph.D.<sup>†,\*</sup>

<sup>†</sup>Department of Public Health Sciences, Pennsylvania State University Tobacco Center of Regulatory Science (TCORS), Pennsylvania State University College of Medicine, Hershey, PA.

<sup>‡</sup>Department of Food Science, Pennsylvania State University, College of Agricultural Sciences, University Park, PA.

\***Corresponding Author.** Department of Public Health Sciences, Pennsylvania State University Tobacco Center of Regulatory Science (TCORS), Pennsylvania State University College of Medicine, 500 University Dr. – Mail Code: CH69, Hershey, PA, USA 17033. Phone: 717-531-5381; E-mail: jrichie@psu.edu

**Supplementary Table 1:** Carbonyl Delivery of each product on a Per Puff Basis with Number of Puffs Given for the ISO Method

| Product Type   | Brand                | Formaldehyde (µg/puff) | Acetaldehyde (µg/puff) | Acetone (µg/puff) | Acrolein (µg/puff) | Propionaldehyde (µg/puff) | Crotonaldehyde (µg/puff) | MEK (µg/puff) | Number of Puffs |
|----------------|----------------------|------------------------|------------------------|-------------------|--------------------|---------------------------|--------------------------|---------------|-----------------|
| Little Cigar   | Captain Black Sweets | 1.6 ± 0.1              | 75.0 ± 8.8             | 32.9 ± 4.3        | 6.7 ± 1.5          | 5.5 ± 0.6                 | 1.2 ± 0.1                | 4.7 ± 0.4     | 12              |
|                | Winchester           | 1.1 ± 0.1              | 84.7 ± 1.2             | 41.2 ± 5.0        | 7.7 ± 0.2          | 5.8 ± 0.3                 | 0.8 ± 0.1                | 5.1 ± 0.1     | 10              |
| Filtered Cigar | Cheyenne             | 1.7 ± 0.1              | 58.3 ± 2.3             | 23.2 ± 1.0        | 4.3 ± 0.3          | 3.8 ± 0.5                 | 1.5 ± 0.3                | 5.2 ± 0.6     | 16              |
|                | Criss Cross          | 1.3 ± 0.1              | 39.7 ± 4.4             | 23.3 ± 0.3        | 3.3 ± 1.0          | 2.4 ± 0.6                 | 0.6 ± 0.1                | 3.3 ± 0.6     | 24              |
| Cigarettes     | 3R4F                 | 2.0 ± 0.1              | 50.4 ± 2.8             | 18.0 ± 1.1        | 5.4 ± 0.5          | 3.2 ± 0.1                 | 0.2 ± 0.1                | 2.6 ± 0.1     | 9               |
|                | 1R6F                 | 2.5 ± 0.3              | 35.1 ± 0.8             | 11.8 ± 0.1        | 3.8 ± 0.2          | 2.2 ± 0.7                 | 1.9 ± 0.1                | 1.9 ± 0.4     | 8               |

**Supplementary Table 2:** Carbonyl Delivery of each product on a Per Puff Basis with Number of Puffs Given for the HCI Method

| Product Type   | Brand                | Formaldehyde (µg/puff) | Acetaldehyde (µg/puff) | Acetone (µg/puff) | Acrolein (µg/puff) | Propionaldehyde (µg/puff) | Crotonaldehyde (µg/puff) | MEK (µg/puff) | Number of Puffs |
|----------------|----------------------|------------------------|------------------------|-------------------|--------------------|---------------------------|--------------------------|---------------|-----------------|
| Little Cigar   | Captain Black Sweets | 5.5 ± 0.2              | 151.6 ± 5.5            | 73.9 ± 1.8        | 15.5 ± 0.7         | 11.3 ± 0.6                | 2.9 ± 0.4                | 11.0 ± 0.7    | 10              |
|                | Winchester           | 6.2 ± 1.6              | 204.1 ± 11.7           | 101.7 ± 1.5       | 21.9 ± 1.2         | 13.6 ± 0.7                | 4.5 ± 0.8                | 18.0 ± 4.2    | 9               |
| Filtered Cigar | Cheyenne             | 2.5 ± 0.9              | 139.9 ± 4.7            | 62.5 ± 4.4        | 12.4 ± 1.0         | 9.9 ± 0.6                 | 2.4 ± 0.1                | 10.1 ± 0.5    | 18              |
|                | Criss Cross          | 1.5 ± 0.1              | 115.3 ± 4.3            | 46.7 ± 2.0        | 9.3 ± 0.1          | 6.2 ± 0.4                 | 1.9 ± 0.0                | 10.8 ± 0.6    | 18              |
| Cigarettes     | 3R4F                 | 5.4 ± 0.2              | 131.0 ± 11.8           | 50.6 ± 5.2        | 15.6 ± 1.2         | 8.9 ± 0.5                 | 4.2 ± 1.2                | 12.0 ± 1.3    | 11              |
|                | 1R6F                 | 7.4 ± 0.5              | 119.9 ± 0.6            | 44.1 ± 0.5        | 15.0 ± 0.2         | 8.1 ± 0.5                 | 4.0 ± 0.6                | 12.0 ± 2.8    | 9               |
